# Supplementary material
Source: MDPI journal article supplement (https://www.mdpi.com/2073-4441/12/8/2255)

## Passirio

LT = 1

LT = 2

LT = 3

LT = 4

LT = 5

LT = 6

## Gadera

LT = 1

LT = 2

LT = 3

LT = 4

LT = 5

LT = 6

CF skill (% of climatological variance explained)

Streamflow skill (MAEss)

IC skill (% of climatological variance explained)

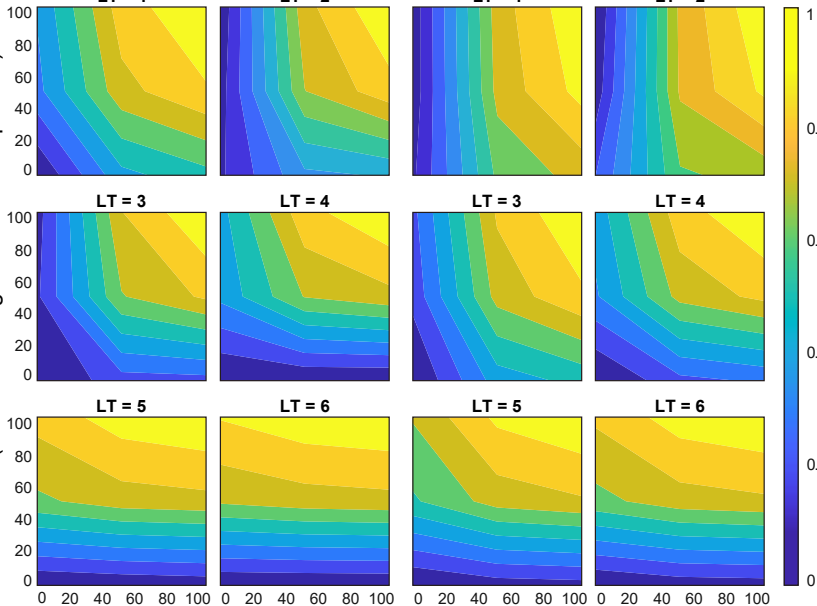

Supplement: s1 [file s1]
