# Supplementary material
Source: MDPI journal article supplement (https://www.mdpi.com/2073-4441/12/8/2255)
Supplement: s1 [file s1]

## Passirio

LT = 1

LT = 2

CF skill (% of climatological variance explained)

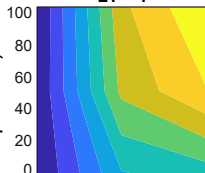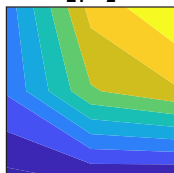

LT = 3

LT = 4

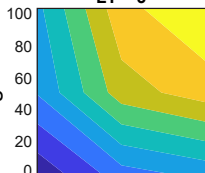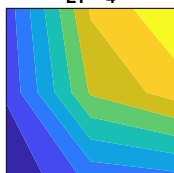

LT = 5

LT = 6

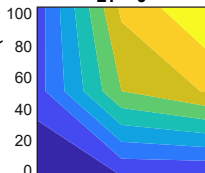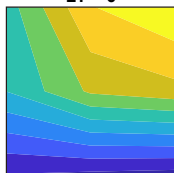

## Gadera

LT = 1

LT = 2

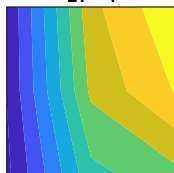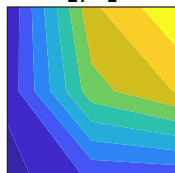

LT = 3

LT = 4

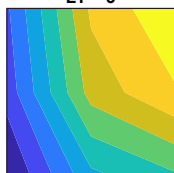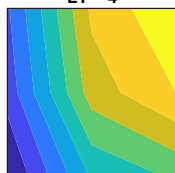

LT = 5

LT = 6

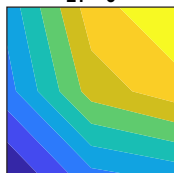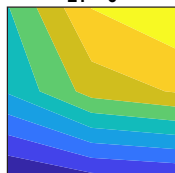

Streamflow skill (MAEss)

1

0.8

0.6

0.4

0.2

0

IC skill (% of climatological variance explained)
