# Supplementary material
Source: MDPI journal article supplement (https://www.mdpi.com/2073-4441/12/8/2255)

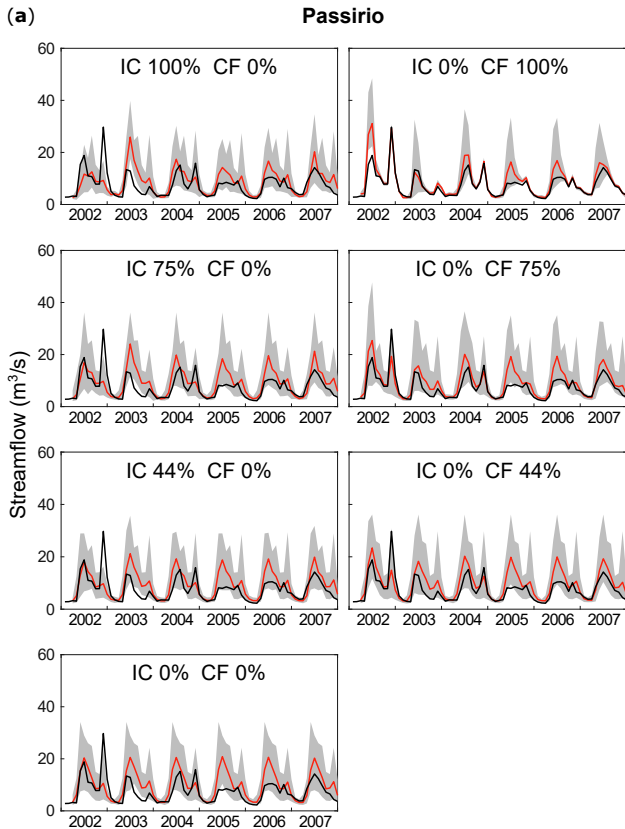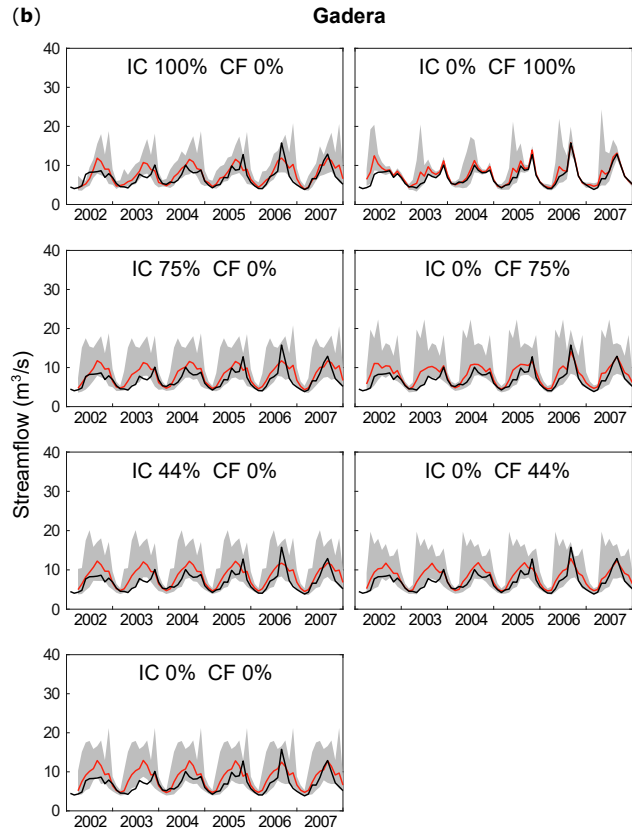

Supplement: s1 [file s1]

CF skill (%)  $W_{CF}$

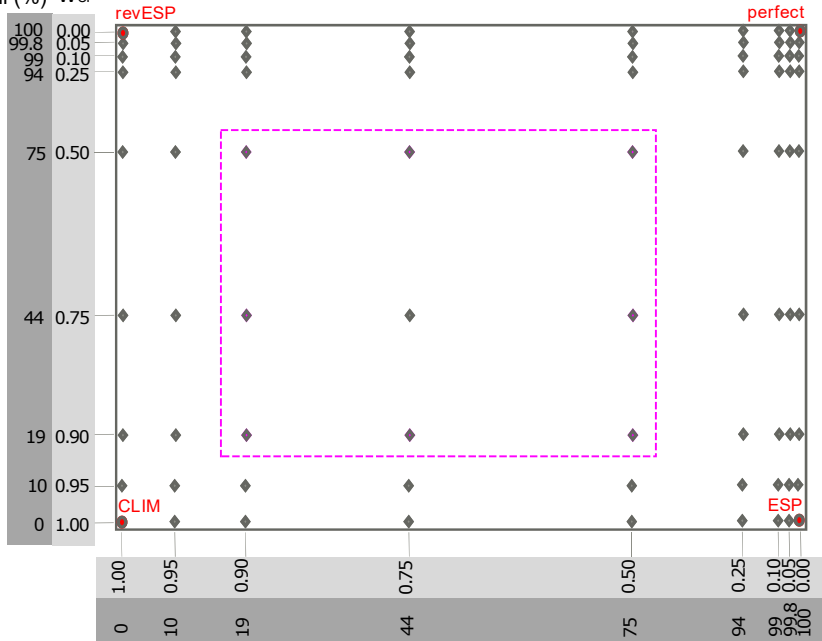

$W_{IC}$

IC skill (%)

Supplement: s1 [file s1]

## Passirio

LT = 1

LT = 2

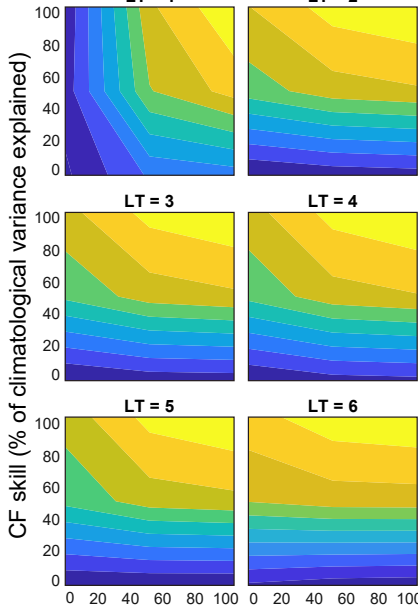

LT = 3

LT = 4

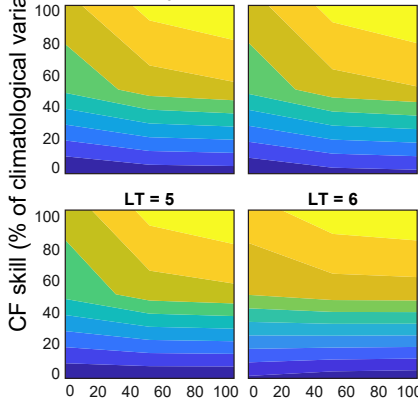

LT = 5

LT = 6

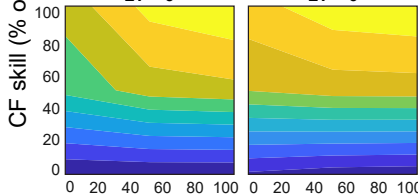

## Gadera

LT = 1

LT = 2

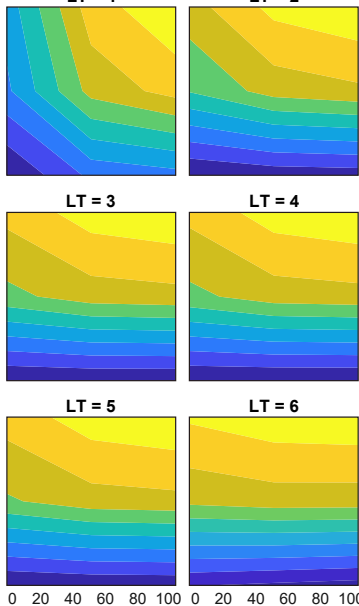

LT = 3

LT = 4

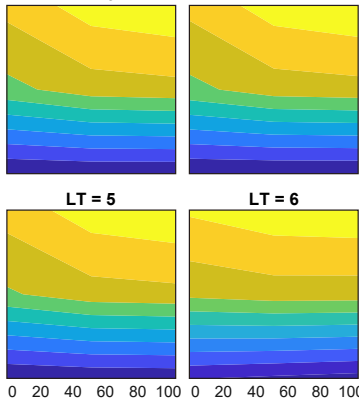

LT = 5

LT = 6

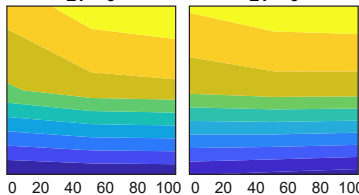

Streamflow skill (MAEss)

Supplement: s1 [file s1]
